# Supplementary material for: Optimizing the First Step of the Biocatalytic Process for Green Leaf Volatiles Production: Lipase-Catalyzed Hydrolysis of Three Vegetable Oils
Source: MDPI journal article supplement (doi:10.3390/ijms241512274), 2023-07-31
Supplement: s1 [file s1]

## Supplementary Materials

**Table S1.** Experimental design (Central composite) for each oil and each lipase

**a) Sunflower oil**

1) CRL

| Sample number<br>(Standard Order) | Randomized Order | pH  | Temperature (°C) | Hydrolysis rate (%) |
|-----------------------------------|------------------|-----|------------------|---------------------|
| 1                                 | 34               | 9.6 | 32.5             | 6.1                 |
| 2                                 | 17               | 9.0 | 40.0             | 10.3                |
| 3                                 | 37               | 7.5 | 32.5             | 88.2                |
| 4                                 | 21               | 9.6 | 32.5             | 6.7                 |
| 5                                 | 30               | 9.0 | 40.0             | 10.3                |
| 6                                 | 38               | 7.5 | 32.5             | 87.5                |
| 7                                 | 32               | 7.5 | 43.1             | 34.1                |
| 8                                 | 10               | 7.5 | 32.5             | 92.1                |
| 9                                 | 29               | 9.0 | 25.0             | 7.7                 |
| 10                                | 14               | 6.0 | 25.0             | 12.4                |
| 11                                | 25               | 7.5 | 32.5             | 91.1                |
| 12                                | 24               | 7.5 | 32.5             | 89.0                |
| 13                                | 12               | 7.5 | 32.5             | 89.3                |
| 14                                | 18               | 7.5 | 21.9             | 20.3                |
| 15                                | 11               | 7.5 | 32.5             | 89.6                |
| 16                                | 35               | 7.5 | 32.5             | 92.1                |
| 17                                | 3                | 9.0 | 25.0             | 7.6                 |
| 18                                | 7                | 5.4 | 32.5             | 50.7                |
| 19                                | 39               | 7.5 | 32.5             | 89.3                |
| 20                                | 15               | 6.0 | 40.0             | 92.6                |
| 21                                | 36               | 7.5 | 32.5             | 87.2                |
| 22                                | 8                | 9.6 | 32.5             | 7.1                 |
| 23                                | 27               | 6.0 | 25.0             | 17.9                |
| 24                                | 13               | 7.5 | 32.5             | 92.1                |
| 25                                | 31               | 7.5 | 21.9             | 20.7                |
| 26                                | 26               | 7.5 | 32.5             | 93.2                |
| 27                                | 2                | 6.0 | 40.0             | 93.7                |
| 28                                | 6                | 7.5 | 43.1             | 35.9                |
| 29                                | 5                | 7.5 | 21.9             | 21.6                |
| 30                                | 22               | 7.5 | 32.5             | 89.3                |
| 31                                | 1                | 6.0 | 25.0             | 15.1                |
| 32                                | 33               | 5.4 | 32.5             | 48.3                |
| 33                                | 23               | 7.5 | 32.5             | 89.6                |
| 34                                | 9                | 7.5 | 32.5             | 93.1                |
| 35                                | 19               | 7.5 | 43.1             | 32.0                |
| 36                                | 4                | 9.0 | 40.0             | 10.2                |
| 37                                | 28               | 6.0 | 40.0             | 92.2                |
| 38                                | 20               | 5.4 | 32.5             | 51.0                |
| 39                                | 16               | 9.0 | 25.0             | 7.9                 |

## 2) PFL

| Sample number<br>(Standard Order) | Randomized Order | pH   | Temperature (°C) | Hydrolysis rate (%) |
|-----------------------------------|------------------|------|------------------|---------------------|
| 1                                 | 3                | 6.0  | 45.0             | 12.0                |
| 2                                 | 36               | 8.0  | 35.0             | 7.2                 |
| 3                                 | 29               | 6.0  | 45.0             | 12.4                |
| 4                                 | 25               | 8.0  | 35.0             | 5.2                 |
| 5                                 | 34               | 8.0  | 49.1             | 4.8                 |
| 6                                 | 12               | 8.0  | 35.0             | 6.9                 |
| 7                                 | 39               | 8.0  | 35.0             | 6.2                 |
| 8                                 | 2                | 10.0 | 25.0             | 7.3                 |
| 9                                 | 26               | 8.0  | 35.0             | 7.8                 |
| 10                                | 1                | 6.0  | 25.0             | 15.0                |
| 11                                | 5                | 5.2  | 35.0             | 21.0                |
| 12                                | 32               | 10.8 | 35.0             | 5.5                 |
| 13                                | 28               | 10.0 | 25.0             | 5.6                 |
| 14                                | 4                | 10.0 | 45.0             | 9.5                 |
| 15                                | 22               | 8.0  | 35.0             | 7.0                 |
| 16                                | 27               | 6.0  | 25.0             | 12.7                |
| 17                                | 31               | 5.2  | 35.0             | 21.5                |
| 18                                | 30               | 10.0 | 45.0             | 5.9                 |
| 19                                | 19               | 10.8 | 35.0             | 6.7                 |
| 20                                | 10               | 8.0  | 35.0             | 4.1                 |
| 21                                | 13               | 8.0  | 35.0             | 6.2                 |
| 22                                | 21               | 8.0  | 49.1             | 7.5                 |
| 23                                | 14               | 6.0  | 25.0             | 12.9                |
| 24                                | 9                | 8.0  | 35.0             | 6.0                 |
| 25                                | 16               | 6.0  | 45.0             | 12.7                |
| 26                                | 11               | 8.0  | 35.0             | 6.2                 |
| 27                                | 24               | 8.0  | 35.0             | 6.7                 |
| 28                                | 37               | 8.0  | 35.0             | 7.3                 |
| 29                                | 15               | 10.0 | 25.0             | 5.0                 |
| 30                                | 8                | 8.0  | 49.1             | 5.2                 |
| 31                                | 18               | 5.2  | 35.0             | 17.4                |
| 32                                | 38               | 8.0  | 35.0             | 7.1                 |
| 33                                | 6                | 10.8 | 35.0             | 5.6                 |
| 34                                | 17               | 10.0 | 45.0             | 6.5                 |
| 35                                | 7                | 8.0  | 20.9             | 3.2                 |
| 36                                | 33               | 8.0  | 20.9             | 1.4                 |
| 37                                | 23               | 8.0  | 35.0             | 6.0                 |
| 38                                | 35               | 8.0  | 35.0             | 6.5                 |
| 39                                | 20               | 8.0  | 20.9             | 1.8                 |

## 3) RML

| Sample number<br>(Standard Order) | Randomized Order | pH  | Temperature (°C) | Hydrolysis rate (%) |
|-----------------------------------|------------------|-----|------------------|---------------------|
| 1                                 | 28               | 9.0 | 25.0             | 1.5                 |
| 2                                 | 10               | 7.5 | 32.5             | 39.2                |
| 3                                 | 8                | 7.5 | 43.1             | 36.3                |
| 4                                 | 20               | 7.5 | 21.9             | 24.0                |
| 5                                 | 9                | 7.5 | 32.5             | 37.5                |
| 6                                 | 36               | 7.5 | 32.5             | 37.2                |
| 7                                 | 14               | 6.0 | 25.0             | 23.2                |
| 8                                 | 37               | 7.5 | 32.5             | 34.2                |
| 9                                 | 11               | 7.5 | 32.5             | 31.2                |
| 10                                | 39               | 7.5 | 32.5             | 30.7                |
| 11                                | 12               | 7.5 | 32.5             | 41.3                |
| 12                                | 33               | 7.5 | 21.9             | 27.8                |
| 13                                | 31               | 5.4 | 32.5             | 22.4                |
| 14                                | 7                | 7.5 | 21.9             | 21.6                |
| 15                                | 38               | 7.5 | 32.5             | 38.7                |
| 16                                | 1                | 6.0 | 25.0             | 24.6                |
| 17                                | 22               | 7.5 | 32.5             | 35.4                |
| 18                                | 27               | 6.0 | 25.0             | 23.9                |
| 19                                | 3                | 6.0 | 40.0             | 28.2                |
| 20                                | 15               | 9.0 | 25.0             | 1.8                 |
| 21                                | 32               | 9.6 | 32.5             | 1.8                 |
| 22                                | 21               | 7.5 | 43.1             | 32.6                |
| 23                                | 5                | 5.4 | 32.5             | 18.3                |
| 24                                | 17               | 9.0 | 40.0             | 1.9                 |
| 25                                | 6                | 9.6 | 32.5             | 1.7                 |
| 26                                | 13               | 7.5 | 32.5             | 36.0                |
| 27                                | 29               | 6.0 | 40.0             | 28.3                |
| 28                                | 18               | 5.4 | 32.5             | 23.7                |
| 29                                | 35               | 7.5 | 32.5             | 37.0                |
| 30                                | 30               | 9.0 | 40.0             | 2.0                 |
| 31                                | 23               | 7.5 | 32.5             | 40.0                |
| 32                                | 4                | 9.0 | 40.0             | 2.0                 |
| 33                                | 19               | 9.6 | 32.5             | 1.9                 |
| 34                                | 16               | 6.0 | 40.0             | 29.2                |
| 35                                | 24               | 7.5 | 32.5             | 36.0                |
| 36                                | 26               | 7.5 | 32.5             | 39.0                |
| 37                                | 2                | 9.0 | 25.0             | 1.8                 |
| 38                                | 25               | 7.5 | 32.5             | 42.0                |
| 39                                | 34               | 7.5 | 43.1             | 48.0                |

**b. Hempseed oil**

1) CRL

| Sample number<br>(Standard Order) | Randomized Order | pH  | Temperature (°C) | Hydrolysis rate (%) |
|-----------------------------------|------------------|-----|------------------|---------------------|
| 1                                 | 24               | 7.5 | 32.5             | 96.3                |
| 2                                 | 32               | 9.6 | 32.5             | 11.5                |
| 3                                 | 20               | 7.5 | 21.9             | 47.7                |
| 4                                 | 39               | 7.5 | 32.5             | 94.3                |
| 5                                 | 21               | 7.5 | 43.1             | 92.0                |
| 6                                 | 9                | 7.5 | 32.5             | 94.0                |
| 7                                 | 6                | 9.6 | 32.5             | 12.3                |
| 8                                 | 28               | 9.0 | 25.0             | 14.9                |
| 9                                 | 27               | 6.0 | 25.0             | 75.9                |
| 10                                | 4                | 9.0 | 40.0             | 32.1                |
| 11                                | 29               | 6.0 | 40.0             | 79.7                |
| 12                                | 11               | 7.5 | 32.5             | 94.2                |
| 13                                | 13               | 7.5 | 32.5             | 92.4                |
| 14                                | 8                | 7.5 | 43.1             | 89.4                |
| 15                                | 19               | 9.6 | 32.5             | 0.0                 |
| 16                                | 16               | 6.0 | 40.0             | 80.5                |
| 17                                | 15               | 9.0 | 25.0             | 15.3                |
| 18                                | 22               | 7.5 | 32.5             | 100.0               |
| 19                                | 2                | 9.0 | 25.0             | 11.3                |
| 20                                | 35               | 7.5 | 32.5             | 95.4                |
| 21                                | 5                | 5.4 | 32.5             | 66.1                |
| 22                                | 31               | 5.4 | 32.5             | 63.3                |
| 23                                | 34               | 7.5 | 43.1             | 90.8                |
| 24                                | 7                | 7.5 | 21.9             | 48.1                |
| 25                                | 25               | 7.5 | 32.5             | 99.7                |
| 26                                | 17               | 9.0 | 40.0             | 26.6                |
| 27                                | 37               | 7.5 | 32.5             | 96.6                |
| 28                                | 26               | 7.5 | 32.5             | 93.1                |
| 29                                | 1                | 6.0 | 25.0             | 74.4                |
| 30                                | 10               | 7.5 | 32.5             | 100.0               |
| 31                                | 36               | 7.5 | 32.5             | 97.4                |
| 32                                | 3                | 6.0 | 40.0             | 81.9                |
| 33                                | 23               | 7.5 | 32.5             | 94.3                |
| 34                                | 33               | 7.5 | 21.9             | 19.1                |
| 35                                | 14               | 6.0 | 25.0             | 72.9                |
| 36                                | 18               | 5.4 | 32.5             | 57.8                |
| 37                                | 30               | 9.0 | 40.0             | 23.2                |
| 38                                | 12               | 7.5 | 32.5             | 92.1                |
| 39                                | 38               | 7.5 | 32.5             | 95.7                |

## 2) PFL

| Sample number (Standard Order) | Randomized Order | pH   | Temperature (°C) | Hydrolysis rate (%) |
|--------------------------------|------------------|------|------------------|---------------------|
| 1                              | 16               | 6.0  | 45.0             | 44.2                |
| 2                              | 12               | 8.0  | 35.0             | 51.9                |
| 3                              | 22               | 8.0  | 35.0             | 48.8                |
| 4                              | 9                | 8.0  | 35.0             | 54.4                |
| 5                              | 35               | 8.0  | 35.0             | 52.4                |
| 6                              | 30               | 10.0 | 45.0             | 32.5                |
| 7                              | 27               | 6.0  | 25.0             | 46.2                |
| 8                              | 20               | 8.0  | 20.9             | 42.3                |
| 9                              | 2                | 10.0 | 25.0             | 40.1                |
| 10                             | 21               | 8.0  | 49.1             | 50.8                |
| 11                             | 37               | 8.0  | 35.0             | 49.8                |
| 12                             | 10               | 8.0  | 35.0             | 51.9                |
| 13                             | 5                | 5.2  | 35.0             | 44.2                |
| 14                             | 17               | 10.0 | 45.0             | 36.1                |
| 15                             | 4                | 10.0 | 45.0             | 33.0                |
| 16                             | 28               | 10.0 | 25.0             | 38.1                |
| 17                             | 15               | 10.0 | 25.0             | 37.3                |
| 18                             | 33               | 8.0  | 20.9             | 42.7                |
| 19                             | 39               | 8.0  | 35.0             | 50.3                |
| 20                             | 34               | 8.0  | 49.1             | 52.3                |
| 21                             | 7                | 8.0  | 20.9             | 42.2                |
| 22                             | 29               | 6.0  | 45.0             | 51.2                |
| 23                             | 26               | 8.0  | 35.0             | 50.8                |
| 24                             | 13               | 8.0  | 35.0             | 52.4                |
| 25                             | 18               | 5.2  | 35.0             | 36.6                |
| 26                             | 36               | 8.0  | 35.0             | 49.3                |
| 27                             | 32               | 10.8 | 35.0             | 21.4                |
| 28                             | 14               | 6.0  | 25.0             | 45.2                |
| 29                             | 19               | 10.8 | 35.0             | 22.4                |
| 30                             | 6                | 10.8 | 35.0             | 23.4                |
| 31                             | 1                | 6.0  | 25.0             | 43.7                |
| 32                             | 24               | 8.0  | 35.0             | 48.8                |
| 33                             | 3                | 6.0  | 45.0             | 47.3                |
| 34                             | 38               | 8.0  | 35.0             | 51.3                |
| 35                             | 31               | 5.2  | 35.0             | 41.7                |
| 36                             | 23               | 8.0  | 35.0             | 52.4                |
| 37                             | 25               | 8.0  | 35.0             | 51.9                |
| 38                             | 8                | 8.0  | 49.1             | 50.9                |
| 39                             | 11               | 8.0  | 35.0             | 54.9                |

## 3) RML

| Sample number (Standard Order) | Randomized Order | pH  | Temperature (°C) | Hydrolysis rate (%) |
|--------------------------------|------------------|-----|------------------|---------------------|
| 1                              | 16               | 6.0 | 40.0             | 9.3                 |
| 2                              | 12               | 7.5 | 32.5             | 32.2                |
| 3                              | 22               | 7.5 | 32.5             | 30.4                |
| 4                              | 9                | 7.5 | 32.5             | 31.2                |
| 5                              | 35               | 7.5 | 32.5             | 34.1                |
| 6                              | 30               | 9.0 | 40.0             | 26.3                |
| 7                              | 27               | 6.0 | 25.0             | 22.3                |
| 8                              | 20               | 7.5 | 21.9             | 21.7                |
| 9                              | 2                | 9.0 | 25.0             | 0.0                 |
| 10                             | 21               | 7.5 | 43.1             | 34.7                |
| 11                             | 37               | 7.5 | 32.5             | 29.7                |
| 12                             | 10               | 7.5 | 32.5             | 27.9                |
| 13                             | 5                | 5.4 | 32.5             | 13.0                |
| 14                             | 17               | 9.0 | 40.0             | 26.1                |
| 15                             | 4                | 9.0 | 40.0             | 23.4                |
| 16                             | 28               | 9.0 | 25.0             | 2.5                 |
| 17                             | 15               | 9.0 | 25.0             | 8.5                 |
| 18                             | 33               | 7.5 | 21.9             | 18.0                |
| 19                             | 39               | 7.5 | 32.5             | 29.7                |
| 20                             | 34               | 7.5 | 43.1             | 23.5                |
| 21                             | 7                | 7.5 | 21.9             | 22.3                |
| 22                             | 29               | 6.0 | 40.0             | 18.0                |
| 23                             | 26               | 7.5 | 32.5             | 26.0                |
| 24                             | 13               | 7.5 | 32.5             | 26.6                |
| 25                             | 18               | 5.4 | 32.5             | 14.9                |
| 26                             | 36               | 7.5 | 32.5             | 29.1                |
| 27                             | 32               | 9.6 | 32.5             | 6.8                 |
| 28                             | 14               | 6.0 | 25.0             | 17.3                |
| 29                             | 19               | 9.6 | 32.5             | 5.6                 |
| 30                             | 6                | 9.6 | 32.5             | 9.9                 |
| 31                             | 1                | 6.0 | 25.0             | 19.2                |
| 32                             | 24               | 7.5 | 32.5             | 34.1                |
| 33                             | 3                | 6.0 | 40.0             | 17.3                |
| 34                             | 38               | 7.5 | 32.5             | 32.2                |
| 35                             | 31               | 5.4 | 32.5             | 15.0                |
| 36                             | 23               | 7.5 | 32.5             | 34.1                |
| 37                             | 25               | 7.5 | 32.5             | 33.5                |
| 38                             | 8                | 7.5 | 43.1             | 22.3                |
| 39                             | 11               | 7.5 | 32.5             | 32.2                |

c. Linseed oil

1) CRL

| Sample number<br>(Standard Order) | Randomized Order | pH  | Temperature (°C) | Hydrolysis rate (%) |
|-----------------------------------|------------------|-----|------------------|---------------------|
| 1                                 | 6                | 9.6 | 32.5             | 9.4                 |
| 2                                 | 12               | 7.5 | 32.5             | 57.9                |
| 3                                 | 10               | 7.5 | 32.5             | 62.7                |
| 4                                 | 1                | 6.0 | 25.0             | 70.6                |
| 5                                 | 5                | 5.4 | 32.5             | 100.0               |
| 6                                 | 7                | 7.5 | 21.9             | 58.4                |
| 7                                 | 11               | 7.5 | 32.5             | 74.6                |
| 8                                 | 13               | 7.5 | 32.5             | 58.6                |
| 9                                 | 4                | 9.0 | 40.0             | 9.1                 |
| 10                                | 3                | 6.0 | 40.0             | 58.0                |
| 11                                | 9                | 7.5 | 32.5             | 55.7                |
| 12                                | 8                | 7.5 | 43.1             | 60.7                |
| 13                                | 2                | 9.0 | 25.0             | 11.3                |
| 14                                | 19               | 9.6 | 32.5             | 12.8                |
| 15                                | 25               | 7.5 | 32.5             | 56.2                |
| 16                                | 23               | 7.5 | 32.5             | 57.8                |
| 17                                | 14               | 6.0 | 25.0             | 72.1                |
| 18                                | 18               | 5.4 | 32.5             | 89.7                |
| 19                                | 20               | 7.5 | 21.9             | 56.0                |
| 20                                | 24               | 7.5 | 32.5             | 56.7                |
| 21                                | 26               | 7.5 | 32.5             | 58.4                |
| 22                                | 17               | 9.0 | 40.0             | 10.1                |
| 23                                | 16               | 6.0 | 40.0             | 64.7                |
| 24                                | 22               | 7.5 | 32.5             | 58.1                |
| 25                                | 21               | 7.5 | 43.1             | 29.9                |
| 26                                | 15               | 9.0 | 25.0             | 14.8                |
| 27                                | 32               | 9.6 | 32.5             | 8.3                 |
| 28                                | 38               | 7.5 | 32.5             | 58.9                |
| 29                                | 36               | 7.5 | 32.5             | 57.7                |
| 30                                | 27               | 6.0 | 25.0             | 78.8                |
| 31                                | 31               | 5.4 | 32.5             | 98.0                |
| 32                                | 33               | 7.5 | 21.9             | 57.2                |
| 33                                | 37               | 7.5 | 32.5             | 57.5                |
| 34                                | 39               | 7.5 | 32.5             | 59.1                |
| 35                                | 30               | 9.0 | 40.0             | 11.4                |
| 36                                | 29               | 6.0 | 40.0             | 64.7                |
| 37                                | 35               | 7.5 | 32.5             | 57.0                |
| 38                                | 34               | 7.5 | 43.1             | 26.4                |
| 39                                | 28               | 9.0 | 25.0             | 14.9                |

## 2) PFL

| Sample number<br>(Standard Order) | Randomized Order | pH   | Temperature (°C) | Hydrolysis rate (%) |
|-----------------------------------|------------------|------|------------------|---------------------|
| 1                                 | 16               | 6.0  | 45.0             | 32.0                |
| 2                                 | 12               | 8.0  | 35.0             | 14.2                |
| 3                                 | 22               | 8.0  | 35.0             | 19.3                |
| 4                                 | 9                | 8.0  | 35.0             | 16.8                |
| 5                                 | 35               | 8.0  | 35.0             | 17.3                |
| 6                                 | 30               | 10.0 | 45.0             | 14.7                |
| 7                                 | 27               | 6.0  | 25.0             | 37.1                |
| 8                                 | 20               | 8.0  | 20.9             | 29.0                |
| 9                                 | 2                | 10.0 | 25.0             | 10.2                |
| 10                                | 21               | 8.0  | 49.1             | 34.6                |
| 11                                | 37               | 8.0  | 35.0             | 16.3                |
| 12                                | 10               | 8.0  | 35.0             | 17.3                |
| 13                                | 5                | 5.2  | 35.0             | 43.7                |
| 14                                | 17               | 10.0 | 45.0             | 23.4                |
| 15                                | 4                | 10.0 | 45.0             | 22.9                |
| 16                                | 28               | 10.0 | 25.0             | 9.2                 |
| 17                                | 15               | 10.0 | 25.0             | 9.7                 |
| 18                                | 33               | 8.0  | 20.9             | 29.5                |
| 19                                | 39               | 8.0  | 35.0             | 14.7                |
| 20                                | 34               | 8.0  | 49.1             | 31.0                |
| 21                                | 7                | 8.0  | 20.9             | 27.5                |
| 22                                | 29               | 6.0  | 45.0             | 30.0                |
| 23                                | 26               | 8.0  | 35.0             | 15.3                |
| 24                                | 13               | 8.0  | 35.0             | 14.2                |
| 25                                | 18               | 5.2  | 35.0             | 46.3                |
| 26                                | 36               | 8.0  | 35.0             | 16.8                |
| 27                                | 32               | 10.8 | 35.0             | 3.6                 |
| 28                                | 14               | 6.0  | 25.0             | 30.5                |
| 29                                | 19               | 10.8 | 35.0             | 2.5                 |
| 30                                | 6                | 10.8 | 35.0             | 3.6                 |
| 31                                | 1                | 6.0  | 25.0             | 36.1                |
| 32                                | 24               | 8.0  | 35.0             | 18.8                |
| 33                                | 3                | 6.0  | 45.0             | 39.1                |
| 34                                | 38               | 8.0  | 35.0             | 18.3                |
| 35                                | 31               | 5.2  | 35.0             | 43.2                |
| 36                                | 23               | 8.0  | 35.0             | 13.7                |
| 37                                | 25               | 8.0  | 35.0             | 17.8                |
| 38                                | 8                | 8.0  | 49.1             | 36.1                |
| 39                                | 11               | 8.0  | 35.0             | 16.3                |

## 3) RML



| Sample number<br>(Standard Order) | Randomized Order | pH  | Temperature (°C) | Hydrolysis rate (%) |
|-----------------------------------|------------------|-----|------------------|---------------------|
| 1                                 | 16               | 6.0 | 40.0             | 42.2                |
| 2                                 | 12               | 7.5 | 32.5             | 28.3                |
| 3                                 | 22               | 7.5 | 32.5             | 28.8                |
| 4                                 | 9                | 7.5 | 32.5             | 28.3                |
| 5                                 | 35               | 7.5 | 32.5             | 28.5                |
| 6                                 | 30               | 9.0 | 40.0             | 2.5                 |
| 7                                 | 27               | 6.0 | 25.0             | 40.2                |
| 8                                 | 20               | 7.5 | 21.9             | 34.2                |
| 9                                 | 2                | 9.0 | 25.0             | 10.2                |
| 10                                | 21               | 7.5 | 43.1             | 27.3                |
| 11                                | 37               | 7.5 | 32.5             | 28.1                |
| 12                                | 10               | 7.5 | 32.5             | 28.6                |
| 13                                | 5                | 5.4 | 32.5             | 27.5                |
| 14                                | 17               | 9.0 | 40.0             | 3.1                 |
| 15                                | 4                | 9.0 | 40.0             | 1.9                 |
| 16                                | 28               | 9.0 | 25.0             | 11.6                |
| 17                                | 15               | 9.0 | 25.0             | 7.8                 |
| 18                                | 33               | 7.5 | 21.9             | 23.9                |
| 19                                | 39               | 7.5 | 32.5             | 29.0                |
| 20                                | 34               | 7.5 | 43.1             | 28.6                |
| 21                                | 7                | 7.5 | 21.9             | 29.7                |
| 22                                | 29               | 6.0 | 40.0             | 32.6                |
| 23                                | 26               | 7.5 | 32.5             | 28.8                |
| 24                                | 13               | 7.5 | 32.5             | 28.3                |
| 25                                | 18               | 5.4 | 32.5             | 25.7                |
| 26                                | 36               | 7.5 | 32.5             | 28.3                |
| 27                                | 32               | 9.6 | 32.5             | 3.7                 |
| 28                                | 14               | 6.0 | 25.0             | 28.0                |
| 29                                | 19               | 9.6 | 32.5             | 3.4                 |
| 30                                | 6                | 9.6 | 32.5             | 2.2                 |
| 31                                | 1                | 6.0 | 25.0             | 29.5                |
| 32                                | 24               | 7.5 | 32.5             | 28.0                |
| 33                                | 3                | 6.0 | 40.0             | 37.6                |
| 34                                | 38               | 7.5 | 32.5             | 28.5                |
| 35                                | 31               | 5.4 | 32.5             | 30.0                |
| 36                                | 23               | 7.5 | 32.5             | 28.8                |
| 37                                | 25               | 7.5 | 32.5             | 28.5                |
| 38                                | 8                | 7.5 | 43.1             | 28.1                |
| 39                                | 11               | 7.5 | 32.5             | 28.6                |

a) *Sunflower oil*

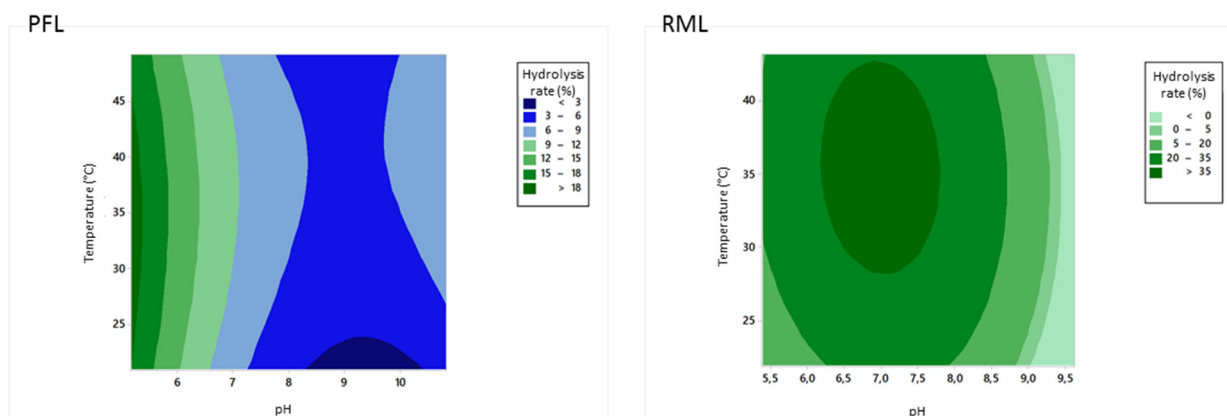

b) *Hempseed oil*

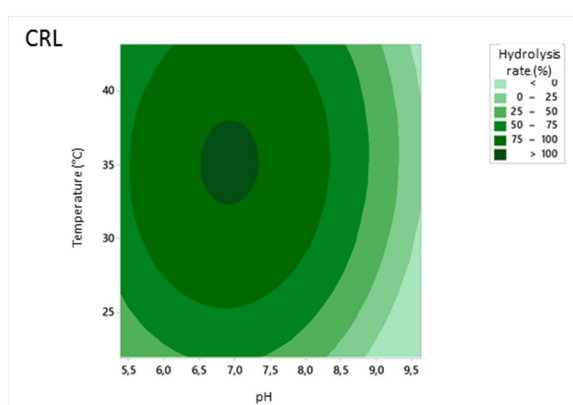

c) *Linseed oil*

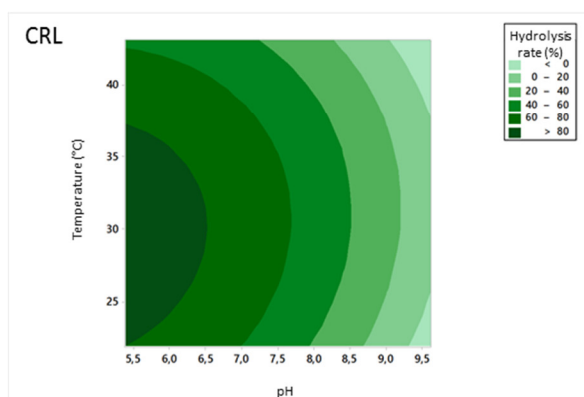

**Figure S1.** Contour plots of the hydrolysis rate (%) after lipolysis on sunflower oil (a) hempseed oil (b) and linseed oil (c), as a function of the temperature (T) and pH (H) for CRL, PFL and RML

a) Sunflower oil

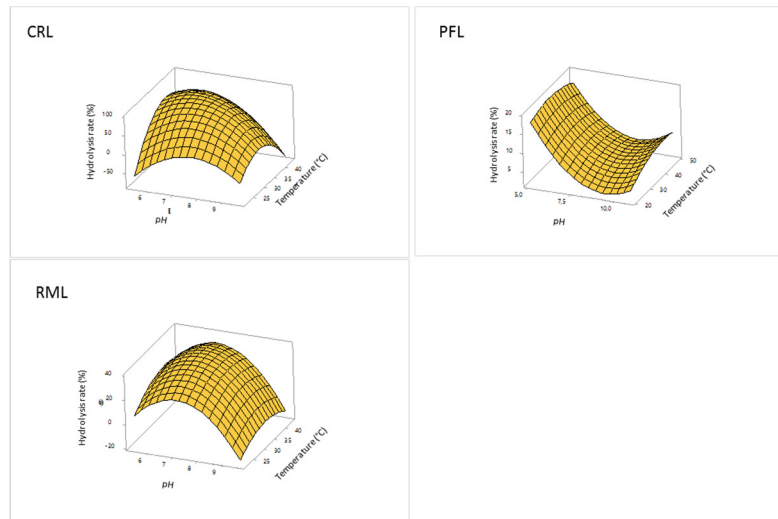

b) Hempseed oil

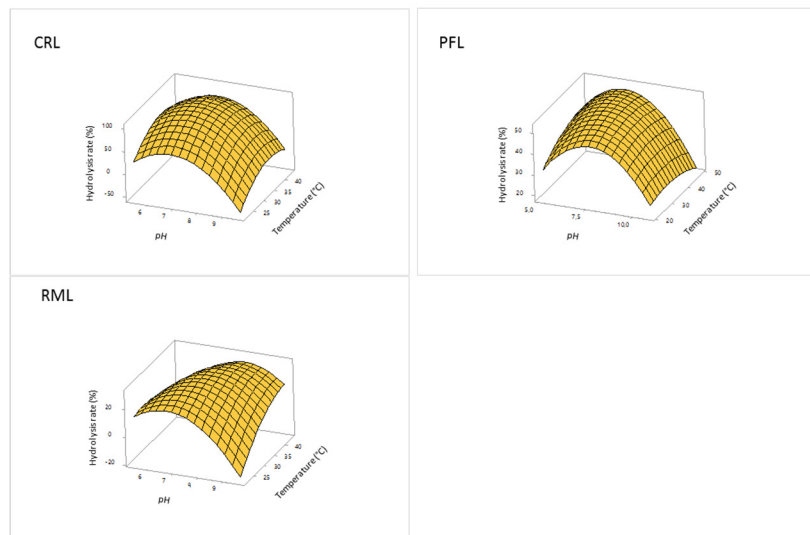

c) Linseed oil

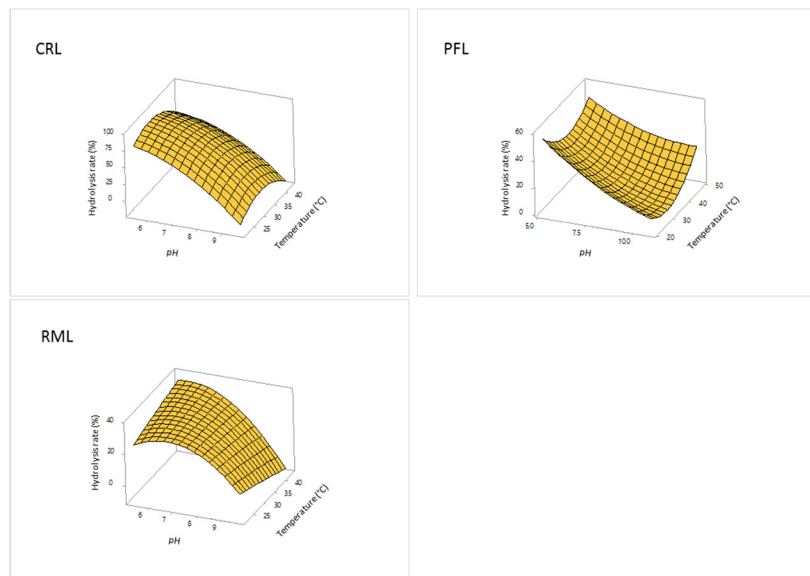

**Figure S2.** Three-dimensional (3D) response surface plots of the hydrolysis rate (%) after lipolysis on sunflower oil (a) hempseed oil (b) and linseed oil (c), as a function of the temperature (T) and pH (H) for CRL, PFL and RML

**Table S2.** Experimental design (Box-Behnken) for each oil with CRL

a. Sunflower oil

| Sample number<br>(Standard Order) | Randomized<br>Order | Duration<br>reaction (h) | Enzyme load<br>(U) | Oil/aqueous ratio of<br>the mixture (%) | Hydrolysis<br>rate (%) |
|-----------------------------------|---------------------|--------------------------|--------------------|-----------------------------------------|------------------------|
| 1                                 | 1                   | 2                        | 800                | 35                                      | 44.1                   |
| 2                                 | 6                   | 8                        | 1900               | 20                                      | 62.5                   |
| 3                                 | 7                   | 2                        | 1900               | 50                                      | 72.5                   |
| 4                                 | 2                   | 8                        | 800                | 35                                      | 51.6                   |
| 5                                 | 15                  | 5                        | 1900               | 35                                      | 93.7                   |
| 6                                 | 45                  | 5                        | 1900               | 35                                      | 93.1                   |
| 7                                 | 39                  | 5                        | 800                | 20                                      | 64.5                   |
| 8                                 | 11                  | 5                        | 800                | 50                                      | 45.6                   |
| 9                                 | 9                   | 5                        | 800                | 20                                      | 60.2                   |
| 10                                | 4                   | 8                        | 3000               | 35                                      | 48.4                   |
| 11                                | 40                  | 5                        | 3000               | 20                                      | 93.7                   |
| 12                                | 5                   | 2                        | 1900               | 20                                      | 58.7                   |
| 13                                | 21                  | 8                        | 1900               | 20                                      | 62.5                   |
| 14                                | 19                  | 8                        | 3000               | 35                                      | 63.3                   |
| 15                                | 17                  | 8                        | 800                | 35                                      | 49.3                   |
| 16                                | 31                  | 2                        | 800                | 35                                      | 36.1                   |
| 17                                | 8                   | 8                        | 1900               | 50                                      | 69.1                   |
| 18                                | 18                  | 2                        | 3000               | 35                                      | 92.0                   |
| 19                                | 26                  | 5                        | 800                | 50                                      | 35.8                   |
| 20                                | 36                  | 8                        | 1900               | 20                                      | 65.6                   |
| 21                                | 34                  | 8                        | 3000               | 35                                      | 46.1                   |
| 22                                | 12                  | 5                        | 3000               | 50                                      | 92.3                   |
| 23                                | 30                  | 5                        | 1900               | 35                                      | 93.4                   |
| 24                                | 22                  | 2                        | 1900               | 50                                      | 73.4                   |
| 25                                | 3                   | 2                        | 3000               | 35                                      | 91.7                   |
| 26                                | 42                  | 5                        | 3000               | 50                                      | 92.0                   |
| 27                                | 28                  | 5                        | 1900               | 35                                      | 96.0                   |
| 28                                | 10                  | 5                        | 3000               | 20                                      | 93.4                   |
| 29                                | 37                  | 2                        | 1900               | 50                                      | 77.1                   |
| 30                                | 13                  | 5                        | 1900               | 35                                      | 90.3                   |
| 31                                | 35                  | 2                        | 1900               | 20                                      | 66.8                   |
| 32                                | 20                  | 2                        | 1900               | 20                                      | 57.3                   |
| 33                                | 23                  | 8                        | 1900               | 50                                      | 80.8                   |
| 34                                | 38                  | 8                        | 1900               | 50                                      | 67.6                   |
| 35                                | 25                  | 5                        | 3000               | 20                                      | 93.1                   |
| 36                                | 43                  | 5                        | 1900               | 35                                      | 95.7                   |
| 37                                | 27                  | 5                        | 3000               | 50                                      | 93.7                   |
| 38                                | 24                  | 5                        | 800                | 20                                      | 69.3                   |
| 39                                | 29                  | 5                        | 1900               | 35                                      | 90.3                   |
| 40                                | 16                  | 2                        | 800                | 35                                      | 32.4                   |
| 41                                | 33                  | 2                        | 3000               | 35                                      | 91.7                   |
| 42                                | 32                  | 8                        | 800                | 35                                      | 60.2                   |

|    |    |   |      |    |       |
|----|----|---|------|----|-------|
| 43 | 41 | 5 | 800  | 50 | 48.4  |
| 44 | 14 | 5 | 1900 | 35 | 100.0 |
| 45 | 44 | 5 | 1900 | 35 | 90.3  |

b. Hempseed oil

| Sample number<br>(Standard Order) | Randomized<br>Order | Duration reaction<br>(h) | Enzyme<br>load (U) | Oil/aqueous ratio of<br>the mixture (%) | Hydrolysis rate<br>(%) |
|-----------------------------------|---------------------|--------------------------|--------------------|-----------------------------------------|------------------------|
| 1                                 | 38                  | 8                        | 1900               | 50                                      | 99.7                   |
| 2                                 | 32                  | 8                        | 800                | 35                                      | 100.0                  |
| 3                                 | 40                  | 5                        | 3000               | 20                                      | 98.6                   |
| 4                                 | 36                  | 8                        | 1900               | 20                                      | 100.0                  |
| 5                                 | 12                  | 5                        | 3000               | 50                                      | 75.1                   |
| 6                                 | 15                  | 5                        | 1900               | 35                                      | 98.8                   |
| 7                                 | 18                  | 2                        | 3000               | 35                                      | 69.9                   |
| 8                                 | 31                  | 2                        | 800                | 35                                      | 39.1                   |
| 9                                 | 6                   | 8                        | 1900               | 20                                      | 100.0                  |
| 10                                | 24                  | 5                        | 800                | 20                                      | 93.9                   |
| 11                                | 27                  | 5                        | 3000               | 50                                      | 100.0                  |
| 12                                | 45                  | 5                        | 1900               | 35                                      | 100.0                  |
| 13                                | 44                  | 5                        | 1900               | 35                                      | 100.0                  |
| 14                                | 5                   | 2                        | 1900               | 20                                      | 50.4                   |
| 15                                | 25                  | 5                        | 3000               | 20                                      | 100.0                  |
| 16                                | 7                   | 2                        | 1900               | 50                                      | 80.3                   |
| 17                                | 37                  | 2                        | 1900               | 50                                      | 73.3                   |
| 18                                | 42                  | 5                        | 3000               | 50                                      | 70.7                   |
| 19                                | 16                  | 2                        | 800                | 35                                      | 22.6                   |
| 20                                | 34                  | 8                        | 3000               | 35                                      | 77.1                   |
| 21                                | 14                  | 5                        | 1900               | 35                                      | 100.0                  |
| 22                                | 13                  | 5                        | 1900               | 35                                      | 93.9                   |
| 23                                | 4                   | 8                        | 3000               | 35                                      | 72.8                   |
| 24                                | 11                  | 5                        | 800                | 50                                      | 55.4                   |
| 25                                | 20                  | 2                        | 1900               | 20                                      | 50.4                   |
| 26                                | 9                   | 5                        | 800                | 20                                      | 83.5                   |
| 27                                | 26                  | 5                        | 800                | 50                                      | 60.9                   |
| 28                                | 28                  | 5                        | 1900               | 35                                      | 97.1                   |
| 29                                | 19                  | 8                        | 3000               | 35                                      | 71.6                   |
| 30                                | 2                   | 8                        | 800                | 35                                      | 95.9                   |
| 31                                | 23                  | 8                        | 1900               | 50                                      | 94.5                   |
| 32                                | 21                  | 8                        | 1900               | 20                                      | 100.0                  |
| 33                                | 10                  | 5                        | 3000               | 20                                      | 95.4                   |
| 34                                | 35                  | 2                        | 1900               | 20                                      | 48.7                   |
| 35                                | 30                  | 5                        | 1900               | 35                                      | 93.9                   |
| 36                                | 22                  | 2                        | 1900               | 50                                      | 69.9                   |
| 37                                | 3                   | 2                        | 3000               | 35                                      | 78.6                   |
| 38                                | 41                  | 5                        | 800                | 50                                      | 60.0                   |
| 39                                | 8                   | 8                        | 1900               | 50                                      | 95.1                   |

|    |    |   |      |    |       |
|----|----|---|------|----|-------|
| 40 | 1  | 2 | 800  | 35 | 32.8  |
| 41 | 33 | 2 | 3000 | 35 | 73.0  |
| 42 | 17 | 8 | 800  | 35 | 93.0  |
| 43 | 43 | 5 | 1900 | 35 | 100.0 |
| 44 | 39 | 5 | 800  | 20 | 91.0  |
| 45 | 29 | 5 | 1900 | 35 | 94.5  |

c. Linseed oil

| Sample number<br>(Standard Order) | Randomized<br>Order | Duration reaction<br>(h) | Enzyme<br>load (U) | Oil/aqueous ratio of<br>the mixture (%) | Hydrolysis rate<br>(%) |
|-----------------------------------|---------------------|--------------------------|--------------------|-----------------------------------------|------------------------|
| 1                                 | 35                  | 2                        | 1900               | 20                                      | 51.5                   |
| 2                                 | 31                  | 2                        | 800                | 35                                      | 98.4                   |
| 3                                 | 42                  | 5                        | 3000               | 50                                      | 74.0                   |
| 4                                 | 40                  | 5                        | 3000               | 20                                      | 52.4                   |
| 5                                 | 43                  | 5                        | 1900               | 35                                      | 87.8                   |
| 6                                 | 33                  | 2                        | 3000               | 35                                      | 86.0                   |
| 7                                 | 39                  | 5                        | 800                | 20                                      | 64.8                   |
| 8                                 | 37                  | 2                        | 1900               | 50                                      | 66.2                   |
| 9                                 | 44                  | 5                        | 1900               | 35                                      | 88.3                   |
| 10                                | 32                  | 8                        | 800                | 35                                      | 97.0                   |
| 11                                | 36                  | 8                        | 1900               | 20                                      | 80.0                   |
| 12                                | 38                  | 8                        | 1900               | 50                                      | 83.7                   |
| 13                                | 45                  | 5                        | 1900               | 35                                      | 91.0                   |
| 14                                | 41                  | 5                        | 800                | 50                                      | 83.7                   |
| 15                                | 34                  | 8                        | 3000               | 35                                      | 73.6                   |
| 16                                | 19                  | 8                        | 3000               | 35                                      | 75.0                   |
| 17                                | 25                  | 5                        | 3000               | 20                                      | 49.2                   |
| 18                                | 22                  | 2                        | 1900               | 50                                      | 65.3                   |
| 19                                | 20                  | 2                        | 1900               | 20                                      | 52.0                   |
| 20                                | 23                  | 8                        | 1900               | 50                                      | 92.6                   |
| 21                                | 26                  | 5                        | 800                | 50                                      | 84.6                   |
| 22                                | 29                  | 5                        | 1900               | 35                                      | 88.3                   |
| 23                                | 27                  | 5                        | 3000               | 50                                      | 72.7                   |
| 24                                | 28                  | 5                        | 1900               | 35                                      | 87.4                   |
| 25                                | 21                  | 8                        | 1900               | 20                                      | 77.7                   |
| 26                                | 17                  | 8                        | 800                | 35                                      | 99.3                   |
| 27                                | 18                  | 2                        | 3000               | 35                                      | 91.8                   |
| 28                                | 24                  | 5                        | 800                | 20                                      | 65.3                   |
| 29                                | 30                  | 5                        | 1900               | 35                                      | 85.1                   |
| 30                                | 16                  | 2                        | 800                | 35                                      | 100.0                  |
| 31                                | 13                  | 5                        | 1900               | 35                                      | 86.4                   |
| 32                                | 2                   | 8                        | 800                | 35                                      | 94.3                   |
| 33                                | 7                   | 2                        | 1900               | 50                                      | 65.3                   |
| 34                                | 11                  | 5                        | 800                | 50                                      | 84.1                   |
| 35                                | 5                   | 2                        | 1900               | 20                                      | 51.5                   |
| 36                                | 6                   | 8                        | 1900               | 20                                      | 70.1                   |

|    |    |   |      |    |       |
|----|----|---|------|----|-------|
| 37 | 14 | 5 | 1900 | 35 | 85.5  |
| 38 | 1  | 2 | 800  | 35 | 100.0 |
| 39 | 15 | 5 | 1900 | 35 | 86.9  |
| 40 | 10 | 5 | 3000 | 20 | 47.8  |
| 41 | 8  | 8 | 1900 | 50 | 85.5  |
| 42 | 4  | 8 | 3000 | 35 | 75.9  |
| 43 | 9  | 5 | 800  | 20 | 68.5  |
| 44 | 12 | 5 | 3000 | 50 | 73.6  |
| 45 | 3  | 2 | 3000 | 35 | 83.2  |

I)  $D \times E$

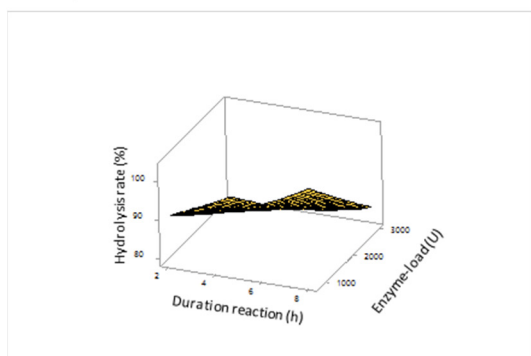

II)  $D \times O$

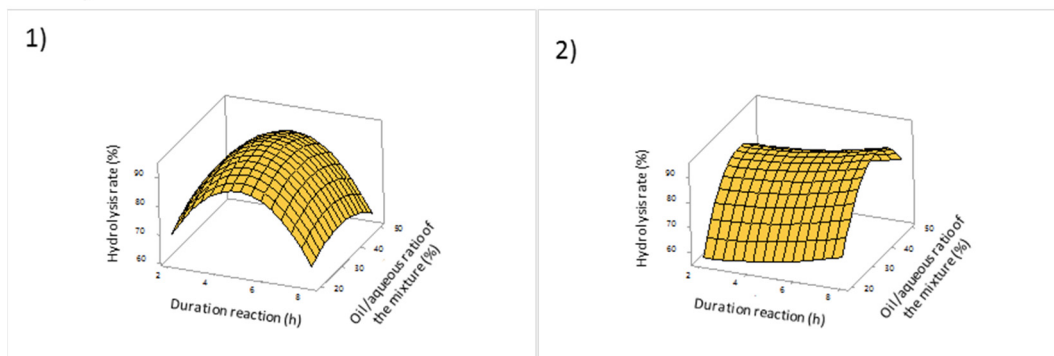

III)  $E \times O$

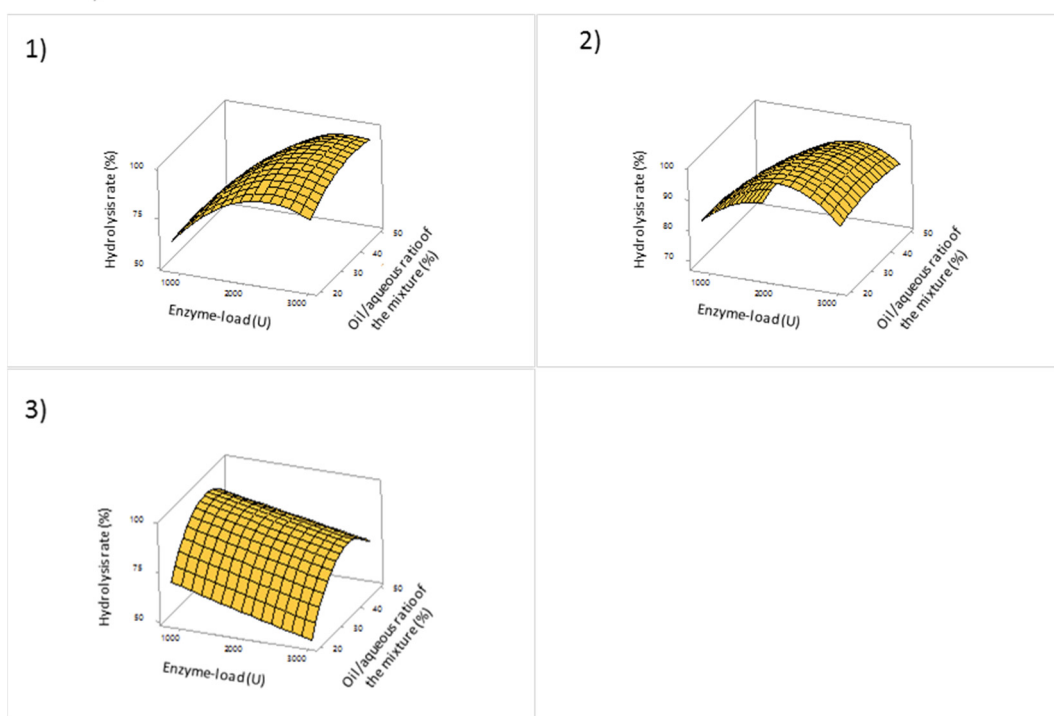

**Figure S3.** Three-dimensional (3D) response surface plots of the hydrolysis rate (%) with CRL, as function of : (I) the duration reaction (D) and enzyme-load (E) for linseed oil ; (II) the duration reaction (D) and oil/aqueous ratio of the mixture (O) for sunflower oil (1) and for linseed oil (2) ; (III) the enzyme-load (E) and oil/aqueous ratio of the mixture (O) for sunflower oil (1), hempseed oil (2) and linseed oil (3). The holding values are : 5 hours for the duration reaction, 1900U for the enzyme-load and 35% for the oil/aqueous ratio of the mixture.
